# Supplementary material
Source: PubMed Central journal article supplement (PMC3059209)

## Supporting Information

### Glutathione Complex Formation with Mercury(II) in Aqueous Solution at Physiological pH

Vicky Mah and Farideh Jalilehvand\*

Department of Chemistry, University of Calgary, Alberta, Canada

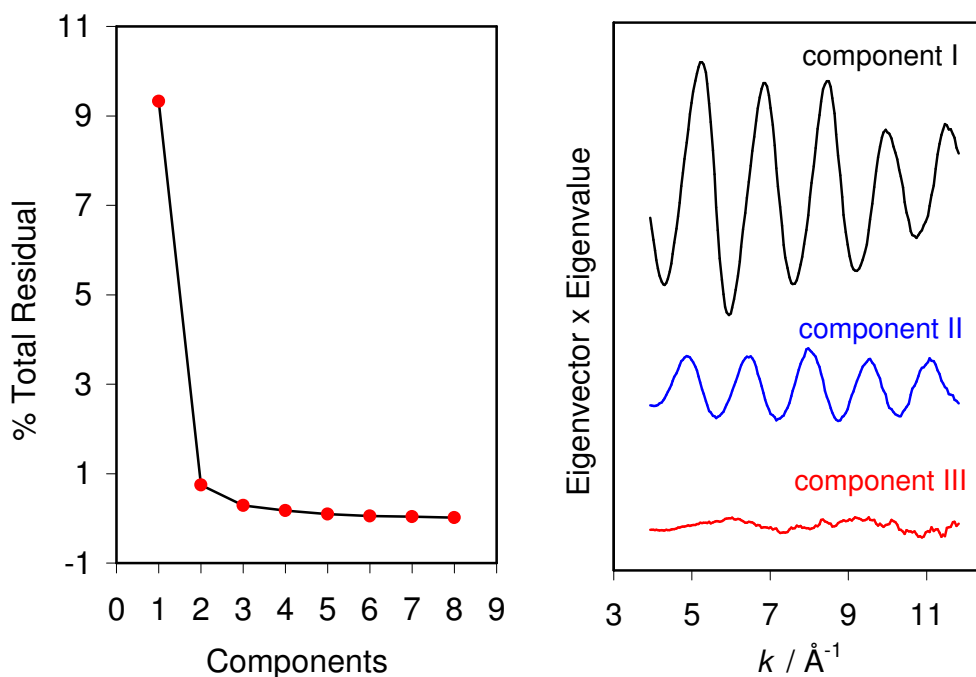

**Figure S-1.** PCA of  $k^3$ -weighted EXAFS oscillations of 9  $\text{Hg}^{\text{II}}$ -glutathione solutions (pH = 7.0) **C1 - F1** ( $C_{\text{Hg(II)}} \sim 17$  mM) and **B2 - F2** ( $C_{\text{Hg(II)}} \sim 50$  mM) over  $k = 3.9 - 11.9 \text{ \AA}^{-1}$ . (left) % Total residual in the reconstructed spectra obtained from consecutive elimination of the components, indicating two major components. (right) First three components with eigenvalues 58.6, 18.0 and 4.2, respectively. (Note: Solutions **A1**, **B1** and **A2**, where one species is dominating, were not included in PCA).

**Table S-1.** % Total residual after consecutive elimination of the components in the PCA of solutions **C1 - F1** and **B2 - F2** (see Figure S-1, left).

| Component | % Total Residual |
|-----------|------------------|
| 8         | 0.016            |
| 7         | 0.036            |
| 6         | 0.063            |
| 5         | 0.096            |
| 4         | 0.182            |
| 3         | 0.288            |
| 2         | 0.746            |
| 1         | 9.328            |

**Figure S-2.** Linear combination fits for solutions **B1–F1** over the range  $k = 3.9 - 11.9 \text{ \AA}^{-1}$ , using EXAFS oscillations for models of  $[\text{Hg}(\text{AH})_2]^{2-}$  (model fit for solution **A1**: Hg-S  $2.325 \text{ \AA}$ ,  $\sigma^2 = 0.004 \text{ \AA}^2$ ) and of  $[\text{Hg}(\text{AH})_3]^{4-}$  (simulated using 3 Hg-S @  $2.42 \text{ \AA}$ ,  $\sigma^2 = 0.006 \text{ \AA}^2$ ,  $\Delta E_0 = 9.0$ ,  $S_0^2 = 1.0$ ).

**Solution B1**

|                                 |      |                  |
|---------------------------------|------|------------------|
| $[\text{Hg}(\text{AH})_2]^{2-}$ | 95 % | Residual = 0.177 |
| $[\text{Hg}(\text{AH})_3]^{4-}$ | 5 %  |                  |

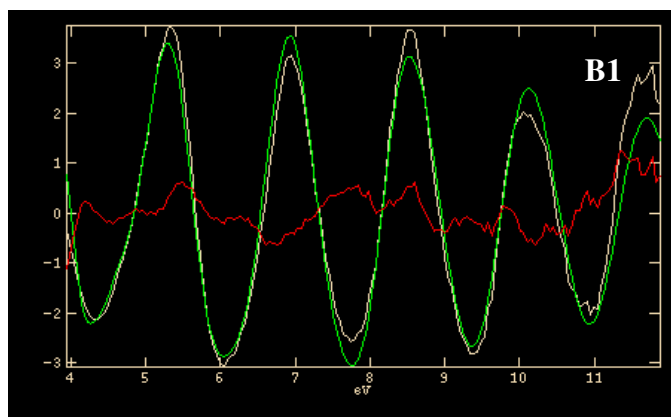

**Solution C1**

|                                 |      |                   |
|---------------------------------|------|-------------------|
| $[\text{Hg}(\text{AH})_2]^{2-}$ | 87 % | Residual = 0.0868 |
| $[\text{Hg}(\text{AH})_3]^{4-}$ | 13 % |                   |

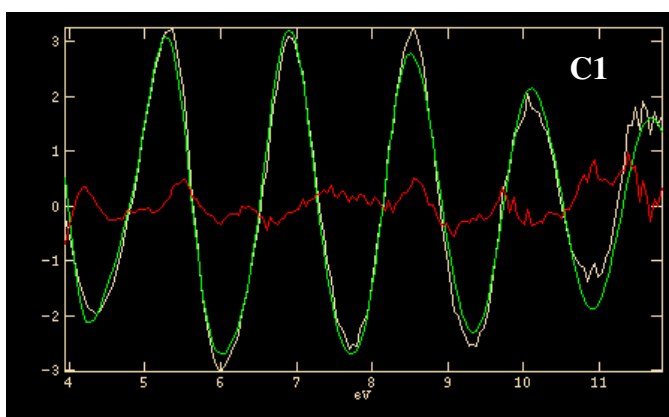

**Solution D1**

|                                 |      |                   |
|---------------------------------|------|-------------------|
| $[\text{Hg}(\text{AH})_2]^{2-}$ | 79 % | Residual = 0.0817 |
| $[\text{Hg}(\text{AH})_3]^{4-}$ | 21 % |                   |

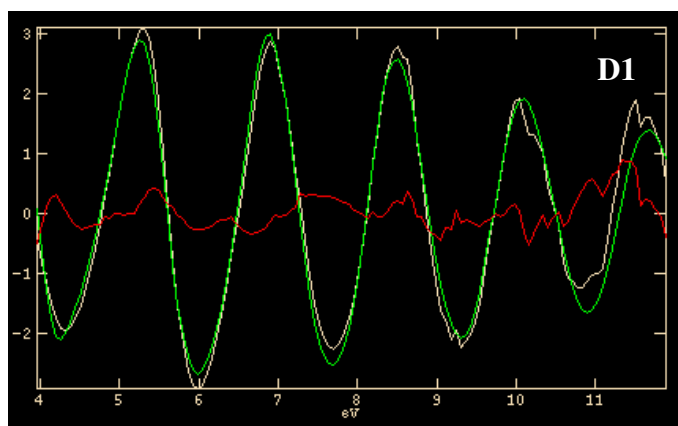

**Solution E1**

|                                 |      |                   |
|---------------------------------|------|-------------------|
| $[\text{Hg}(\text{AH})_2]^{2-}$ | 65 % | Residual = 0.0998 |
| $[\text{Hg}(\text{AH})_3]^{4-}$ | 35 % |                   |

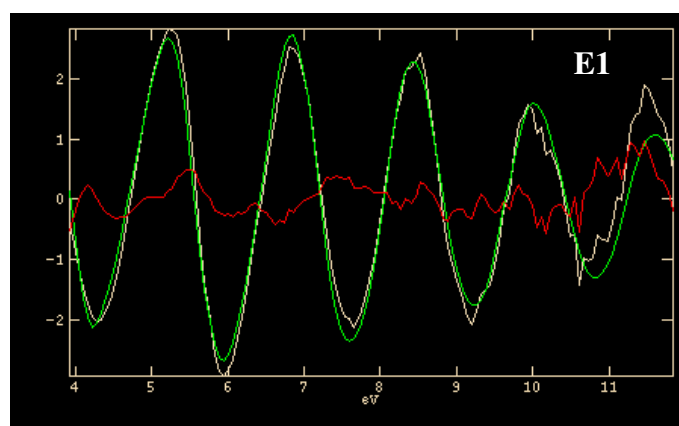

**Solution F1**

|                                 |      |                   |
|---------------------------------|------|-------------------|
| $[\text{Hg}(\text{AH})_2]^{2-}$ | 52 % | Residual = 0.0825 |
| $[\text{Hg}(\text{AH})_3]^{4-}$ | 48 % |                   |

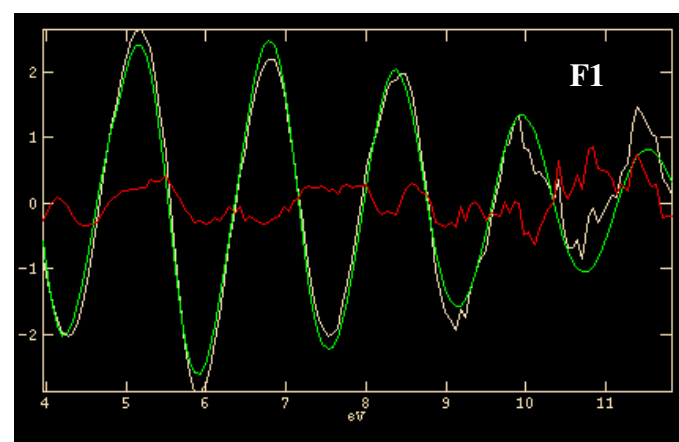

**Figure S-3.** Linear combination fits for solutions **B2–F2** over  $k = 3.9 - 11.9 \text{ \AA}^{-1}$ , using EXAFS models for  $[\text{Hg}(\text{AH})_2]^{2-}$  (model fit for solution **A2**: Hg-S  $2.324 \text{ \AA}$ ,  $\sigma^2 = 0.0035 \text{ \AA}^2$ ) and  $[\text{Hg}(\text{AH})_3]^{4-}$  (simulated using 2 Hg-S @  $2.42 \text{ \AA}$ ,  $\sigma^2 = 0.006 \text{ \AA}^2$ ,  $\Delta E_0 = 9.0$ ,  $S_0^2 = 1.0$ ).

**Solution B2**

|                                 |      |                  |                                 |      |                  |
|---------------------------------|------|------------------|---------------------------------|------|------------------|
| $[\text{Hg}(\text{AH})_2]^{2-}$ | 78 % | Residual = 0.074 | $[\text{Hg}(\text{AH})_2]^{2-}$ | 62 % | Residual = 0.082 |
| $[\text{Hg}(\text{AH})_3]^{4-}$ | 22 % |                  | $[\text{Hg}(\text{AH})_3]^{4-}$ | 38 % |                  |

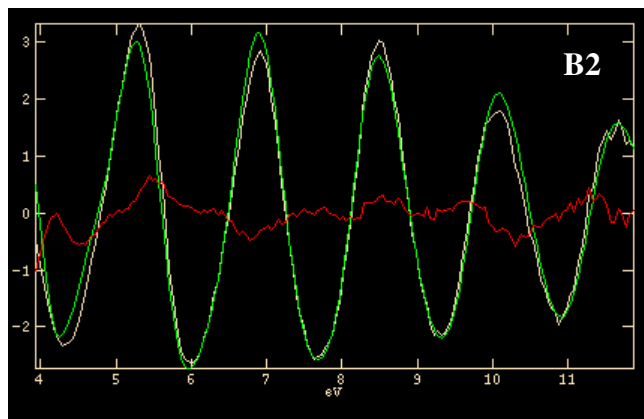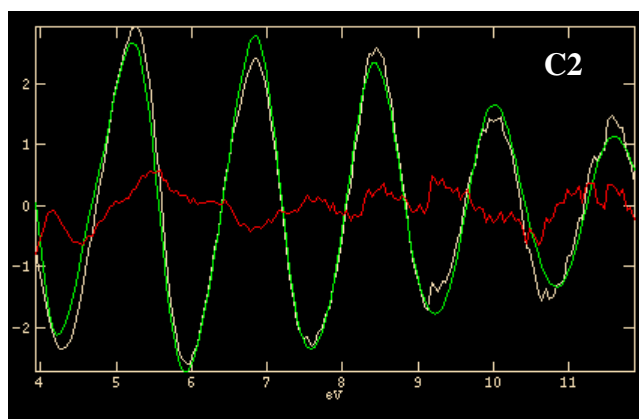

**Solution D2**

|                                 |      |                  |                                 |      |                  |
|---------------------------------|------|------------------|---------------------------------|------|------------------|
| $[\text{Hg}(\text{AH})_2]^{2-}$ | 54 % | Residual = 0.102 | $[\text{Hg}(\text{AH})_2]^{2-}$ | 35 % | Residual = 0.080 |
| $[\text{Hg}(\text{AH})_3]^{4-}$ | 46 % |                  | $[\text{Hg}(\text{AH})_3]^{4-}$ | 65 % |                  |

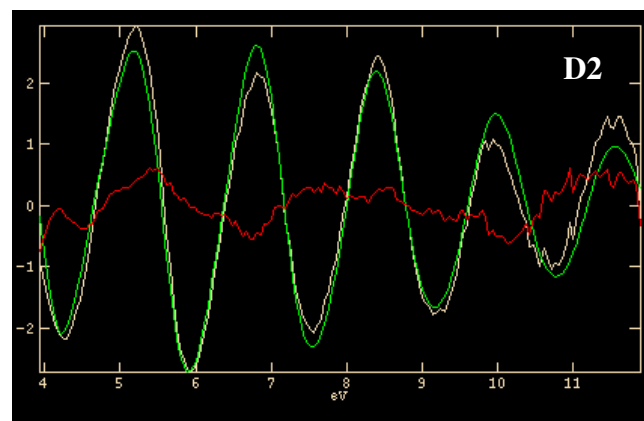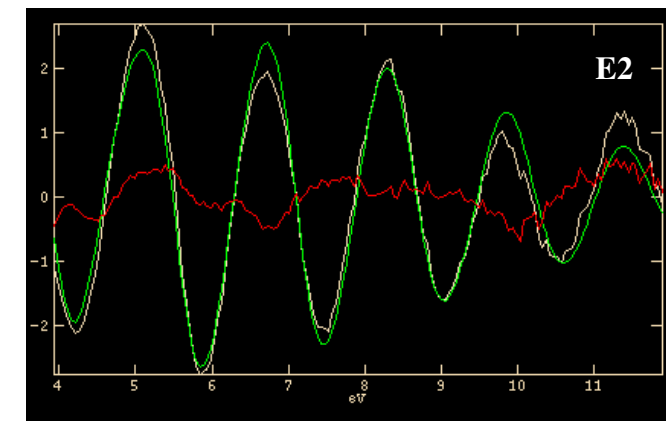

**Solution F2**

|                                 |      |                  |
|---------------------------------|------|------------------|
| $[\text{Hg}(\text{AH})_2]^{2-}$ | 30 % | Residual = 0.080 |
| $[\text{Hg}(\text{AH})_3]^{4-}$ | 70 % |                  |

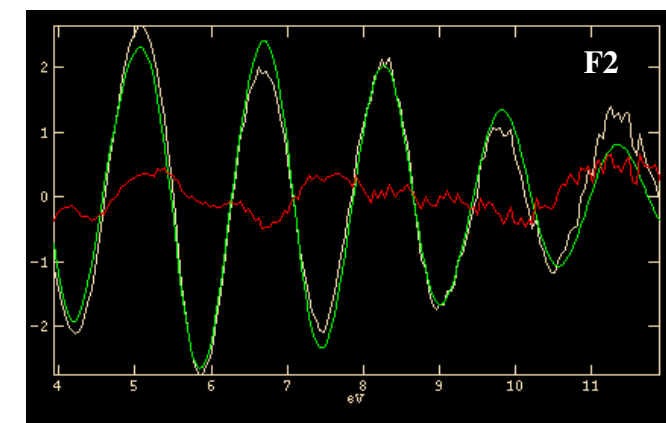

**Table S-2.** Assignment of Mass Ions Observed in ESI Mass Spectra for Solution **F1** (GSH/Hg(II) = 11.8, pH = 7.0) Measured in the Negative Ion Mode as Shown in Figure 3. Glutathione, GSH ( $\text{C}_{10}\text{H}_{17}\text{N}_3\text{O}_6\text{S}$ )  $m = 307.3$ .

| $-m/z$ | Assignment                                             |
|--------|--------------------------------------------------------|
| 1229.6 | $[5\text{Na} + \text{Hg}(\text{GSH})_3 - 8\text{H}]^-$ |
| 1207.6 | $[4\text{Na} + \text{Hg}(\text{GSH})_3 - 7\text{H}]^-$ |
| 878.7  | $[3\text{Na} + \text{Hg}(\text{GSH})_2 - 6\text{H}]^-$ |
| 856.7  | $[2\text{Na} + \text{Hg}(\text{GSH})_2 - 5\text{H}]^-$ |
| 834.7  | $[\text{Na} + \text{Hg}(\text{GSH})_2 - 4\text{H}]^-$  |
| 812.7  | $[\text{Hg}(\text{GSH})_2 - 3\text{H}]^-$              |

**Figure S-4.** Curve-fitting of the Hg L<sub>III</sub>-edge EXAFS spectra for solutions **A1** (17 mM) and **A2** (50 mM) in long *k*-range (13.5 to 14.5 Å<sup>-1</sup>), showing no Hg-Hg scattering

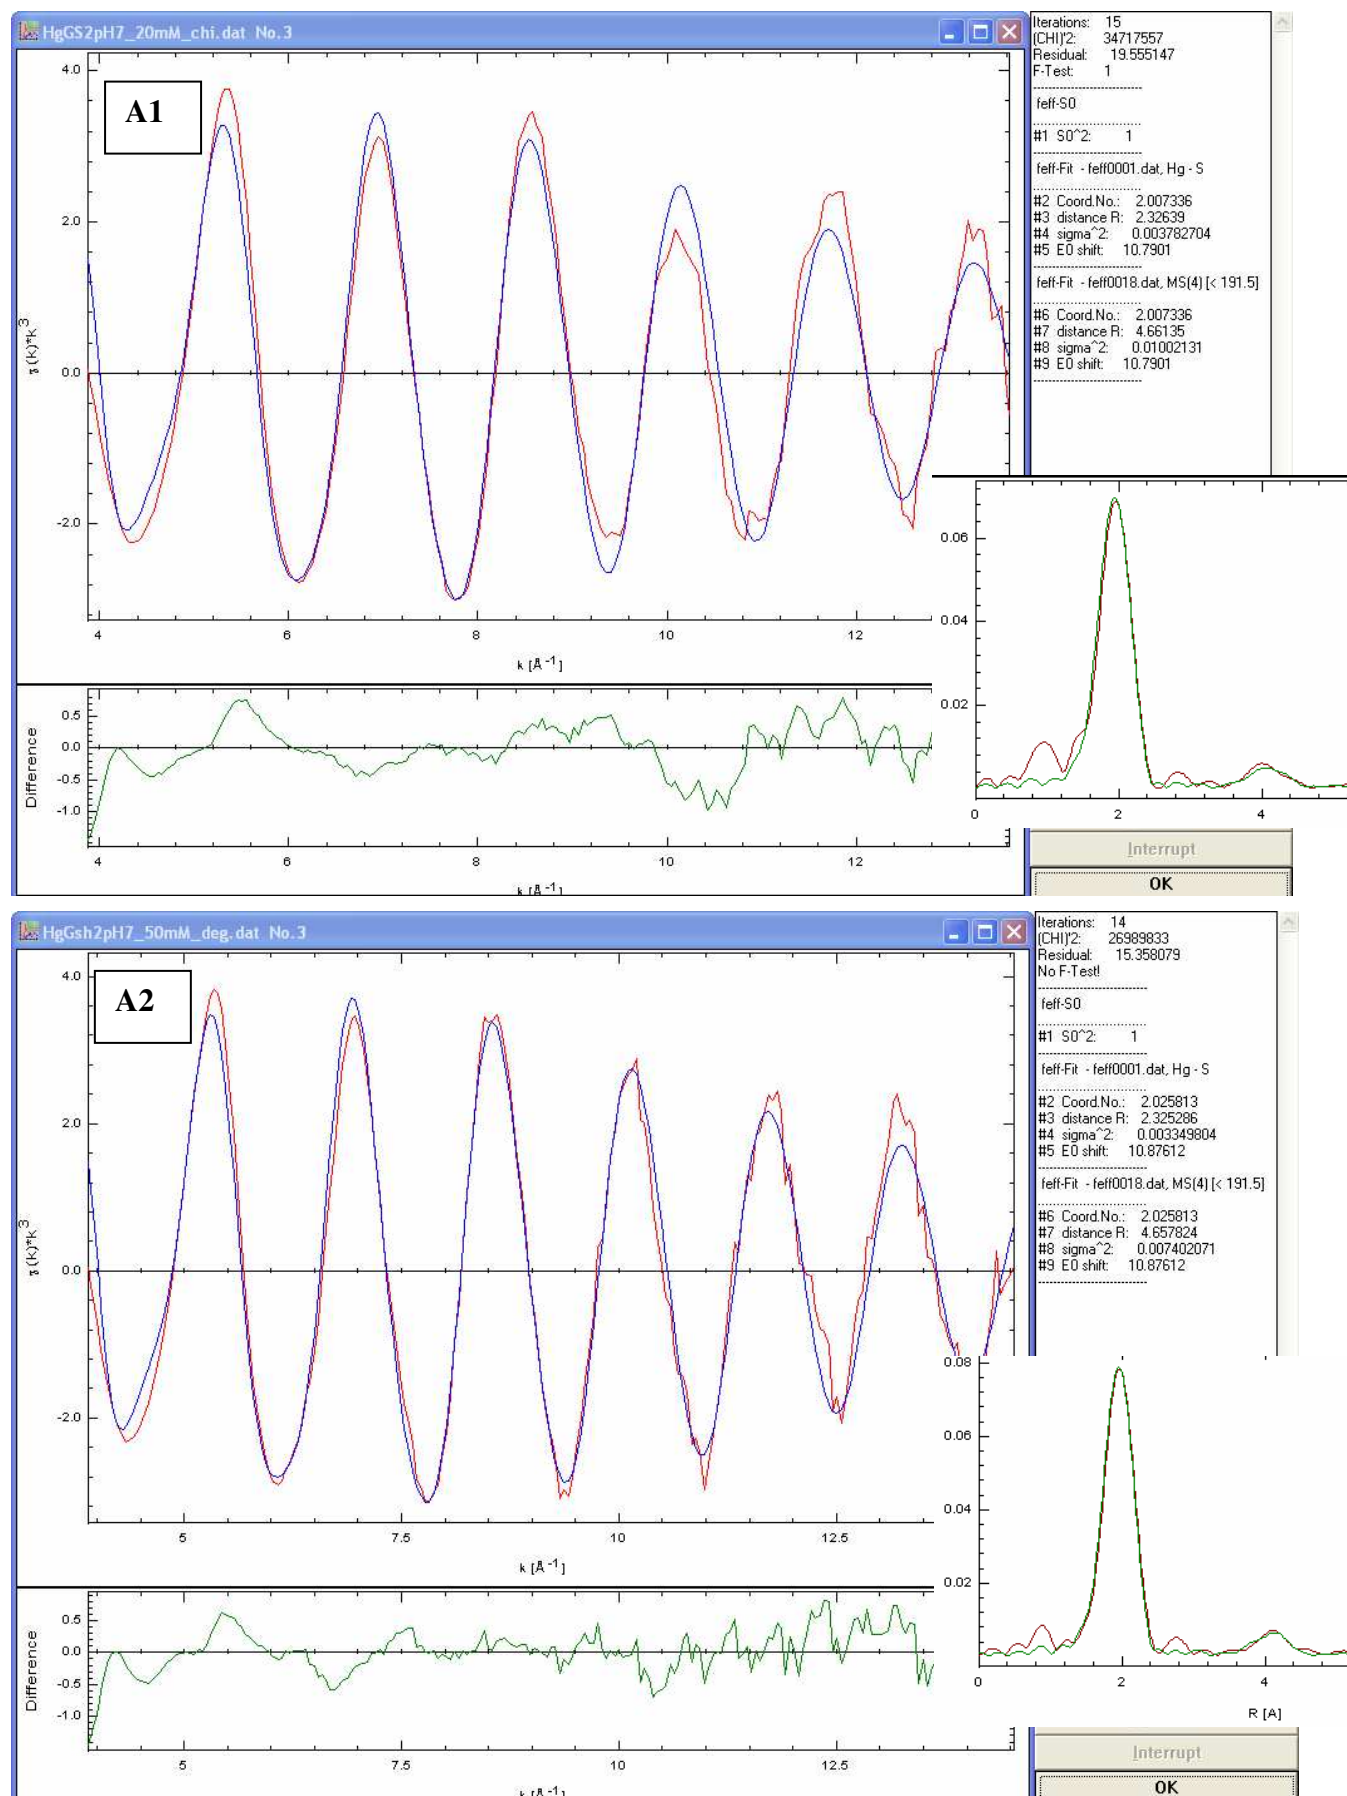

**Figure S-5.** *Top*) Comparison between  $k^3$ -weighted Hg L<sub>III</sub>-edge EXAFS spectra of Hg(II)-GSH solutions **A2** (red) and **F2** (blue) at pH = 7.0, containing  $C_{\text{Hg(II)}} = 50$  and  $C_{\text{GSH}}$  of 0.2 and 0.5 M, respectively; *below*) corresponding Fourier-transforms.

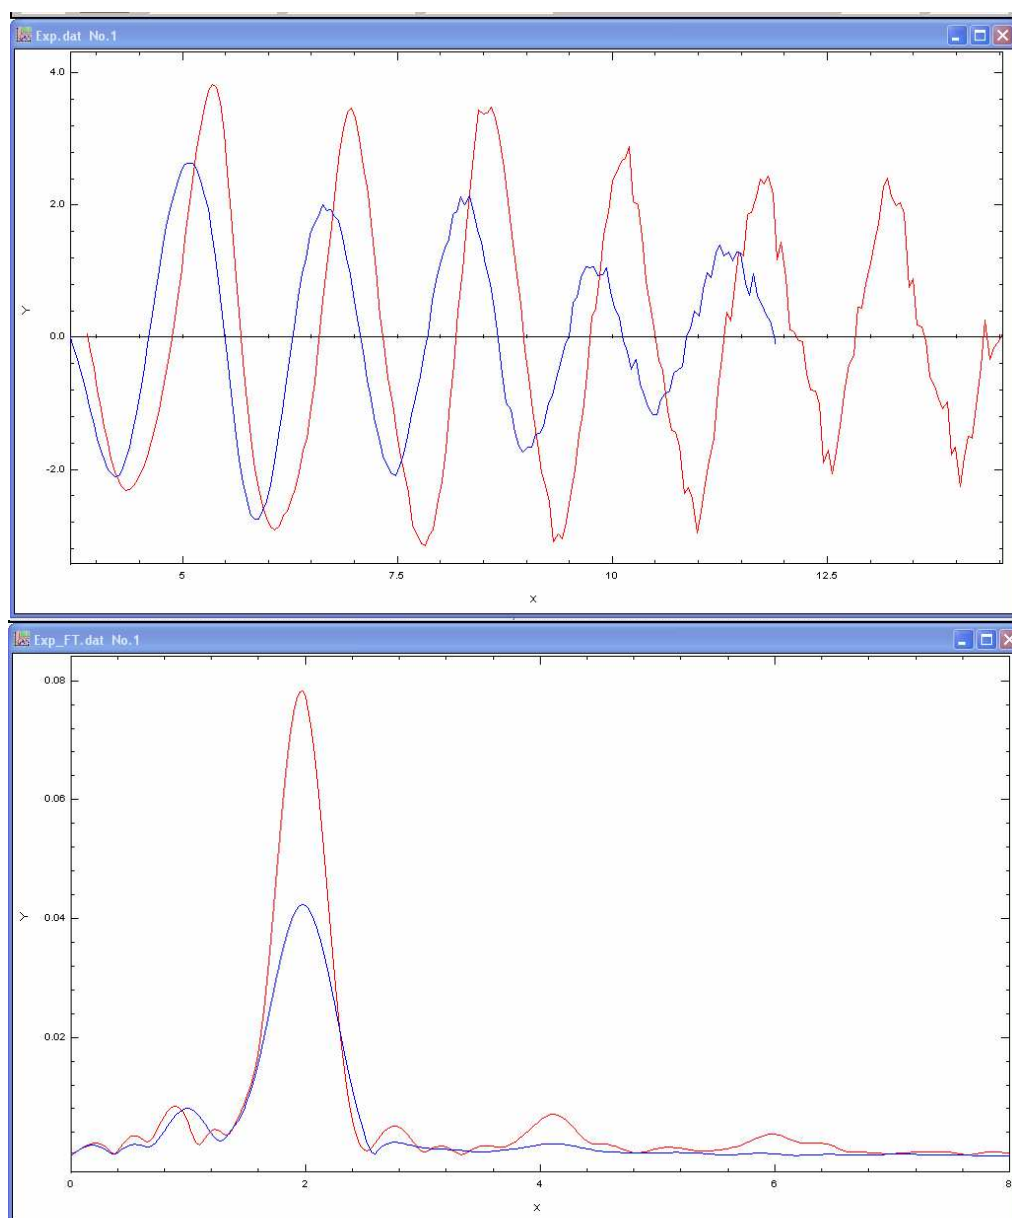

## Appendix I : Stability Constants For Glutathione and Hg(II)-GSH Complexes

Previously reported stability constants for Hg(II)-GSH complexes obtained from Ref. 8 and 19:

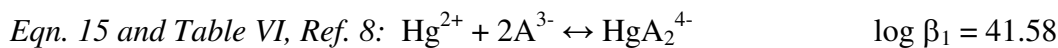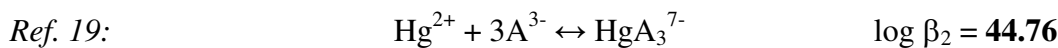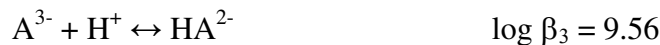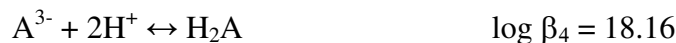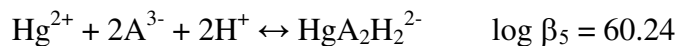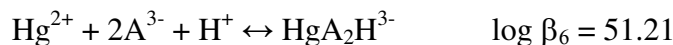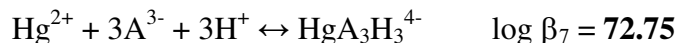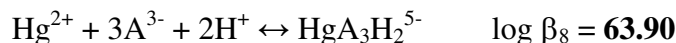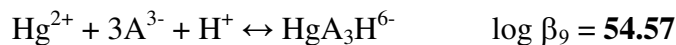

"Adjusted" stability constants for Hg(II)-GSH complexes used in the current study:

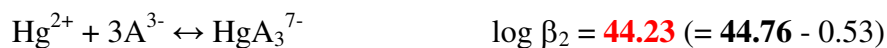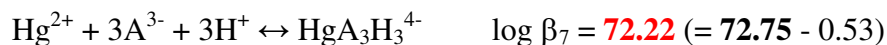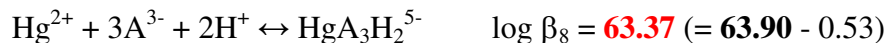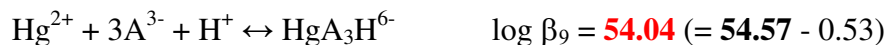

The stability constant values for the  $\text{HgS}_3$  species have been adjusted by -0.53 logarithmic units in this work to account for the relative ratio of  $[\text{Hg}(\text{AH})_2]^{2-} / [\text{Hg}(\text{AH})_3]^{4-}$  complexes obtained from the EXAFS linear combination fittings of  $\text{HgS}_2$  and  $\text{HgS}_3$  models (see Figure S-6a).

In our previous work (20), we obtained distributions of deprotonated  $\text{HgA}_n^{2-3n}$  species with  $n = 2, 3$  and 4 at pH 10.5 from linear combination fitting of EXAFS models. The formation constant  $\log \beta_{10} \approx 44.8$  for the formation of  $[\text{HgA}_4]^{10-}$  complex ( $\text{Hg}^{2+} + 4\text{A}^{3-} \leftrightarrow \text{HgA}_4^{10-}$ ) provides a fraction diagram that approximately accounts for the EXAFS distribution of the  $\text{HgS}_n$  species (see Figure S-6b).

**Figure S-6a.** The fraction diagram vs. total glutathione concentration,  $C_{\text{GSH}}$  or  $[\text{A}^{3-}]_{\text{TOT}}$ , shows the  $[\text{Hg}(\text{AH})_2]^{2-}$  and  $[\text{Hg}(\text{AH})_3]^{4-}$  complexes to be the major Hg(II)-GSH species formed at pH 7.0 in solutions **A2** - **F2**, containing  $[\text{Hg}^{2+}]_{\text{total}} = 50 \text{ mM}$ . The calculations were made with the MEDUSA program (see <http://www.kemi.kth.se/medusa/>), with the stability constant"  $\log \beta_7$  adjusted -0.53 logarithmic units to 72.22 for the  $[\text{Hg}(\text{AH})_3]^{4-}$  complex ( $\text{HgA}_3\text{H}_3^{4-}$  in the figure; see Appendix I). The adjustment shifts the  $C_{\text{GSH}}$  value for equal amounts of  $[\text{Hg}(\text{AH})_2]^{2-}$  and  $[\text{Hg}(\text{AH})_3]^{4-}$  from 0.17 M to 0.27 M. Dots (•) show the proportion of the  $\text{HgS}_3$  complex obtained from EXAFS linear combination fitting (Table 4).

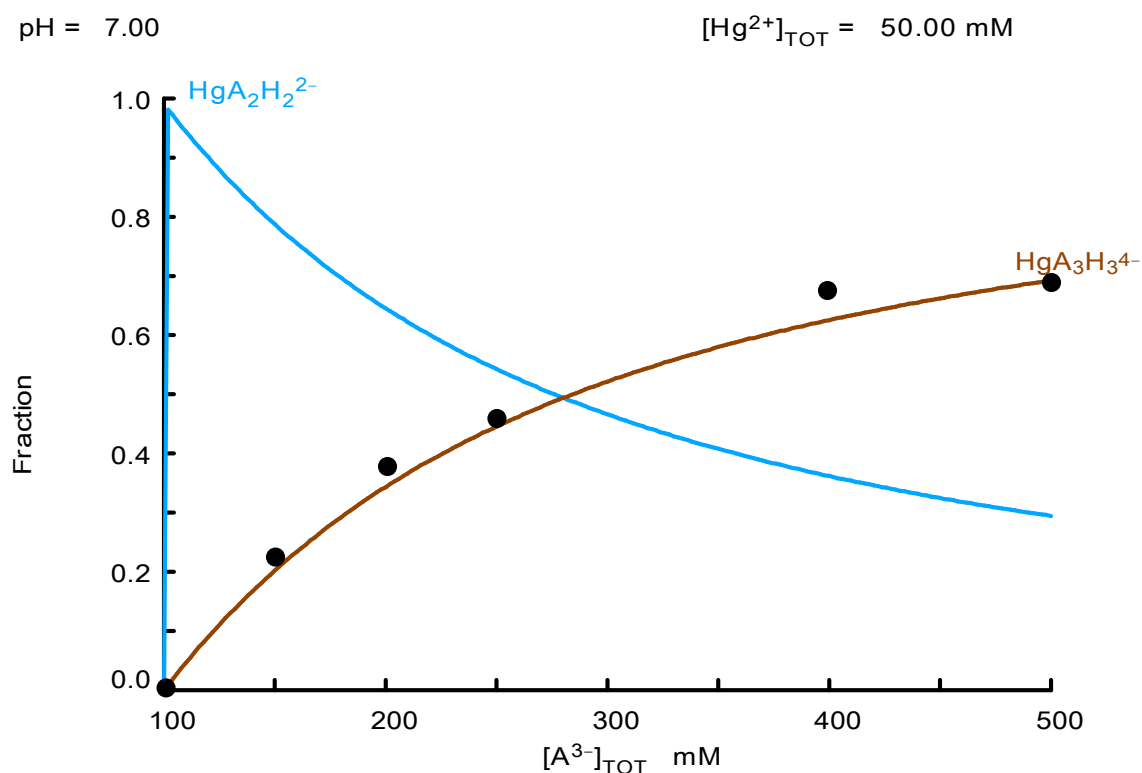

**Figure S-6b.** Fraction diagram vs. total glutathione concentration,  $C_{\text{GSH}}$  or  $[\text{A}^{3-}]_{\text{TOT}}$ , showing the distribution of Hg(II)-GSH species formed at pH 10.5 in solutions containing  $C_{\text{Hg(II)}}$  or  $[\text{Hg}^{2+}]_{\text{TOT}} = 18 \text{ mM}$  (20). The calculations were made with the MEDUSA program (see <http://www.kemi.kth.se/medusa/>), using the adjusted stability constants for  $\text{HgS}_3$  complexes above (see Appendix I), and  $\log \beta_{10} \approx 44.8$  for the formation of the  $[\text{HgA}_4]^{10-}$  complex:  $(\text{Hg}^{2+} + 4\text{A}^{3-} \leftrightarrow \text{HgA}_4^{10-})$ . Circles (○) represent the proportion of the  $\text{HgS}_4$  species obtained from EXAFS linear combination fitting (Table 3, Ref. 20).

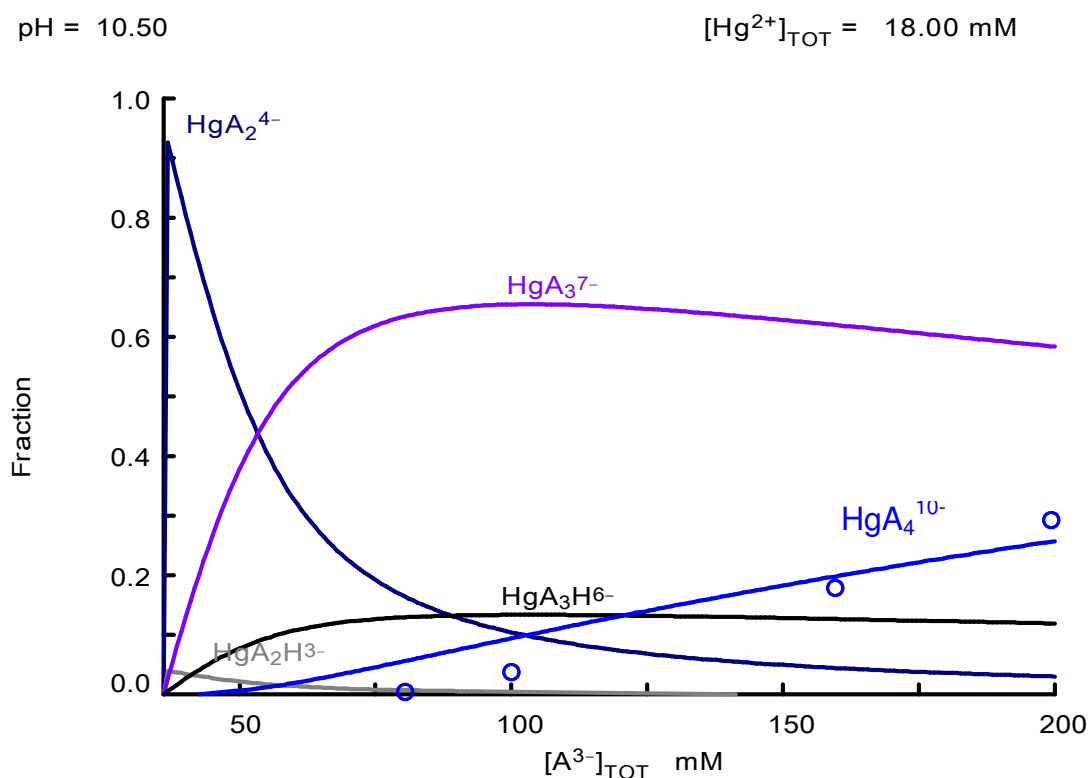

The full input file to the MEDUSA computer program (see <http://www.kemi.kth.se/medusa/>) after the above additions and adjustments is given below. The following log  $\beta$  values are used for the equilibrium formation constants:

3, 15, 1, 0 /MEDUSA, t= 25 C, p= 1

H+

Hg 2+

A 3-

Hg(OH)2 , -6.097 -2 1 0

Hg(OH)3- , -21.1 -3 1 0

Hg2OH 3+ , -3.33 -1 2 0

Hg3(OH)3 3+ , -6.42 -3 3 0

HgA2 4- , 41.58 0 1 2

HgA2H 3- , 51.21 1 1 2

HgA2H2 2- , 60.24 2 1 2

HgA3 7- , 44.23 0 1 3 (adjusted)

HgA3H 6- , 54.04 1 1 3 (adjusted)

HgA3H2 5- , 63.37 2 1 3 (adjusted)

HgA3H3 4- , 72.22 3 1 3 (adjusted)

HgA4 10- , 44.8 0 1 4 (this work)

H2A- , 18.16 2 0 1

HA 2- , 9.56 1 0 1

OH- , -14.0 -1 0 0

Hg(OH)2(c) , -2.601 -2 1 0

A 3-, H+,

LAV, -5.0 -12.0

T, 0.05

T, 0.5

**Figure S-7a.** Fraction diagram showing the distribution of Hg(II) complexes vs. pH for  $C_{\text{Hg(II)}} = 0.017$  M, (top)  $C_{\text{GSH}} = 0.06$  M as in solution **B1**, and (below)  $C_{\text{Hg(II)}} = 0.017$  M and  $C_{\text{GSH}} = 0.2$  M as in **F1**, calculated with the adjusted stability constants (Appendix I).

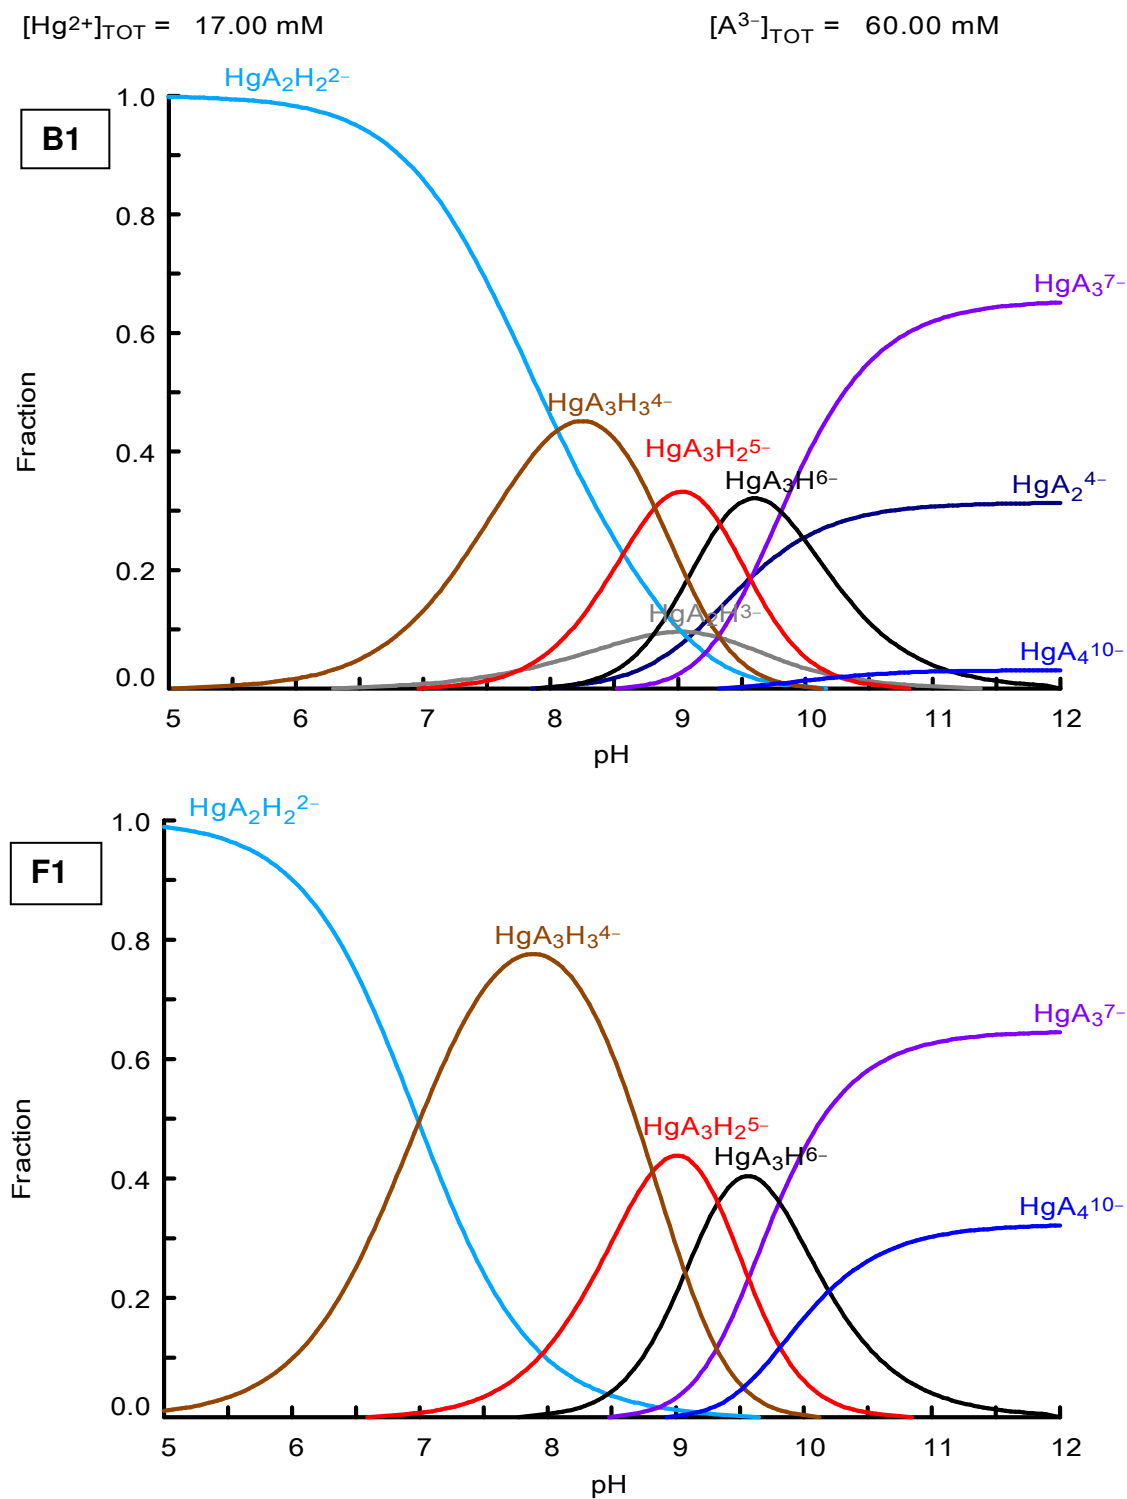

**Figure S-7b.** Fraction diagram showing the distribution of Hg(II) complexes vs. pH for  $C_{\text{Hg(II)}} = 0.050$  M and  $C_{\text{GSH}} = 0.15$  M as in solution **B2**, calculated according to the adjusted formation constants (Appendix I).

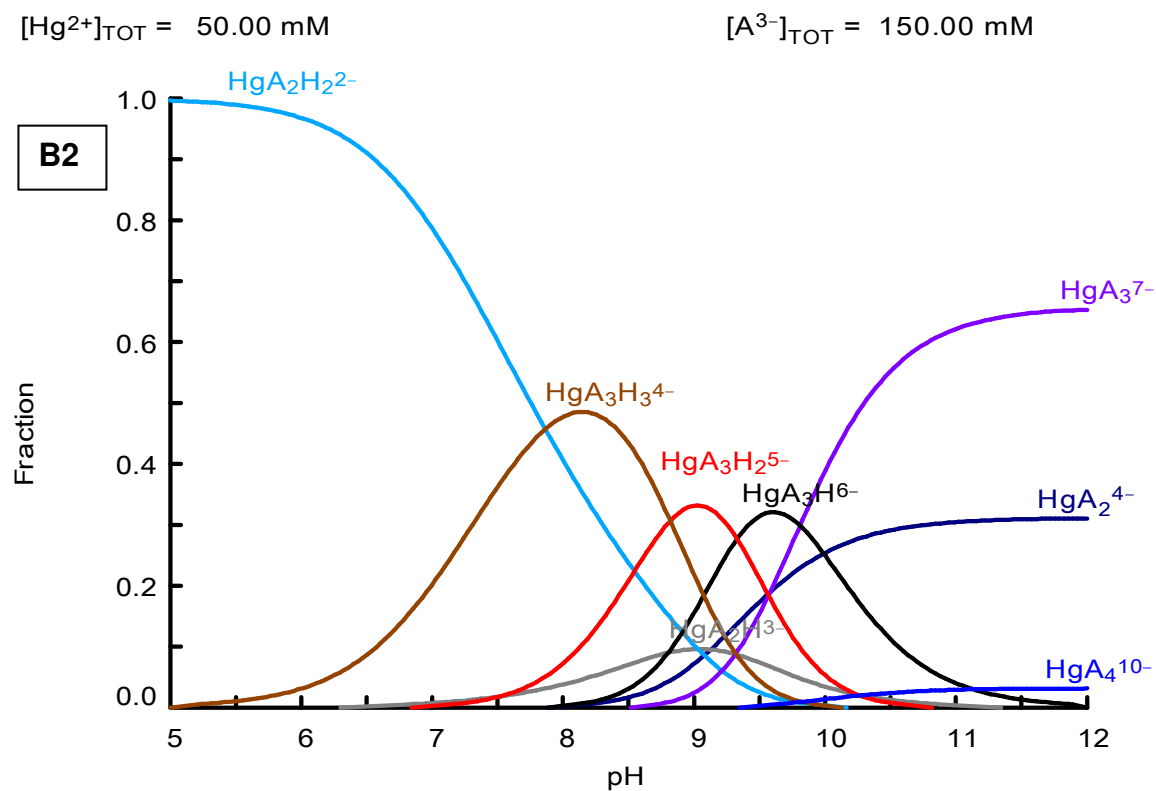

**Figure S-7c.** Diagram showing the fraction of glutathione ( $\text{AH}_3$ ) species vs. pH in an aqueous solution containing  $C_{\text{Hg(II)}} = 0.050 \text{ M}$  and  $C_{\text{GSH}} = 0.5 \text{ M}$  (as in solution **F2**), calculated based on the adjusted formation constants (Appendix I).

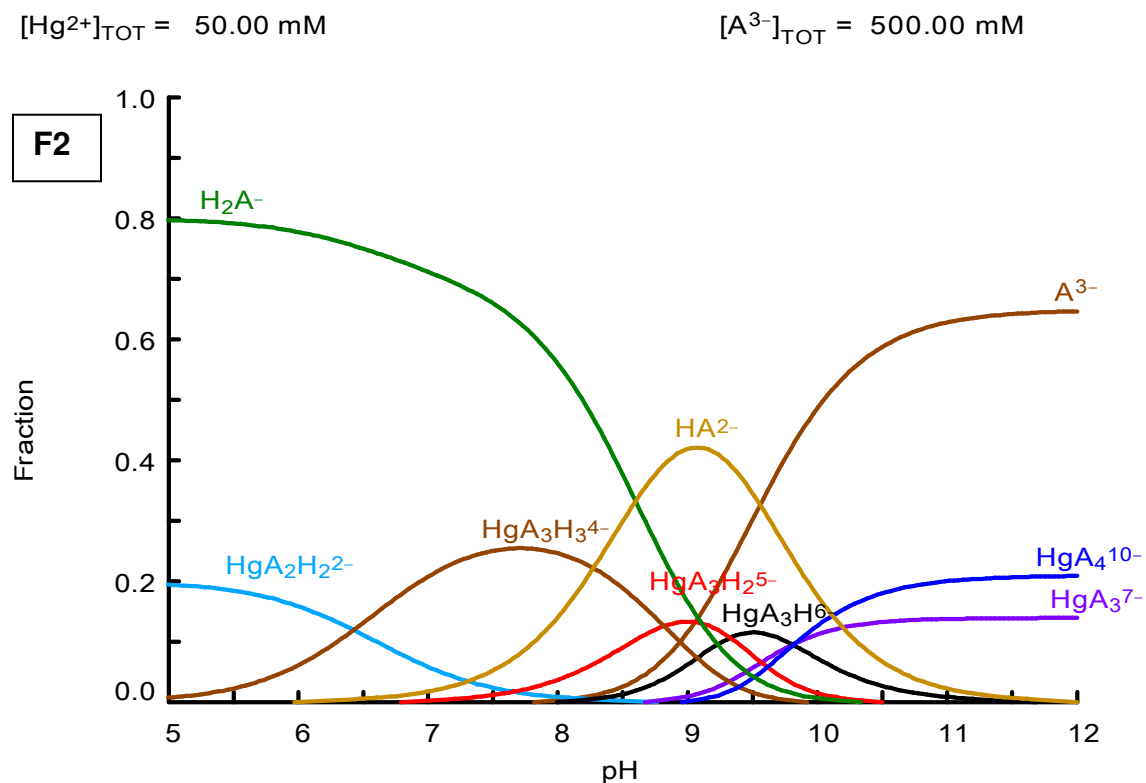

**Figure S-8.** The diagrams below are calculated for  $C_{\text{Hg(II)}}$  from 0 to 1 mM in glutathione GSH solution under physiological conditions (pH 7.4,  $C_{\text{GSH}} = 2.2 \text{ mM}$ ) with the adjusted stability constants in Appendix I. (*top*) The concentrations (logarithmic scale) shows that the dominating Hg(II) complex is  $[\text{Hg}(\text{AH})_2]^{2-}$  with about 2% present as the first deprotonated  $\text{HgS}_2$  species,  $[\text{Hg}(\text{AH})(\text{A})]^{3-}$  (grey line). (*below*) The fraction diagram shows that the proportions of the two major complexes,  $[\text{Hg}(\text{AH})_2]^{2-}$  and  $[\text{Hg}(\text{AH})_3]^{4-}$  are about 95% and 3% of the total Hg(II) amount in dilute Hg(II) solutions (up to 0.1 mM); the percentage goes down at higher Hg(II)-concentration because of the lower free GSH concentration.

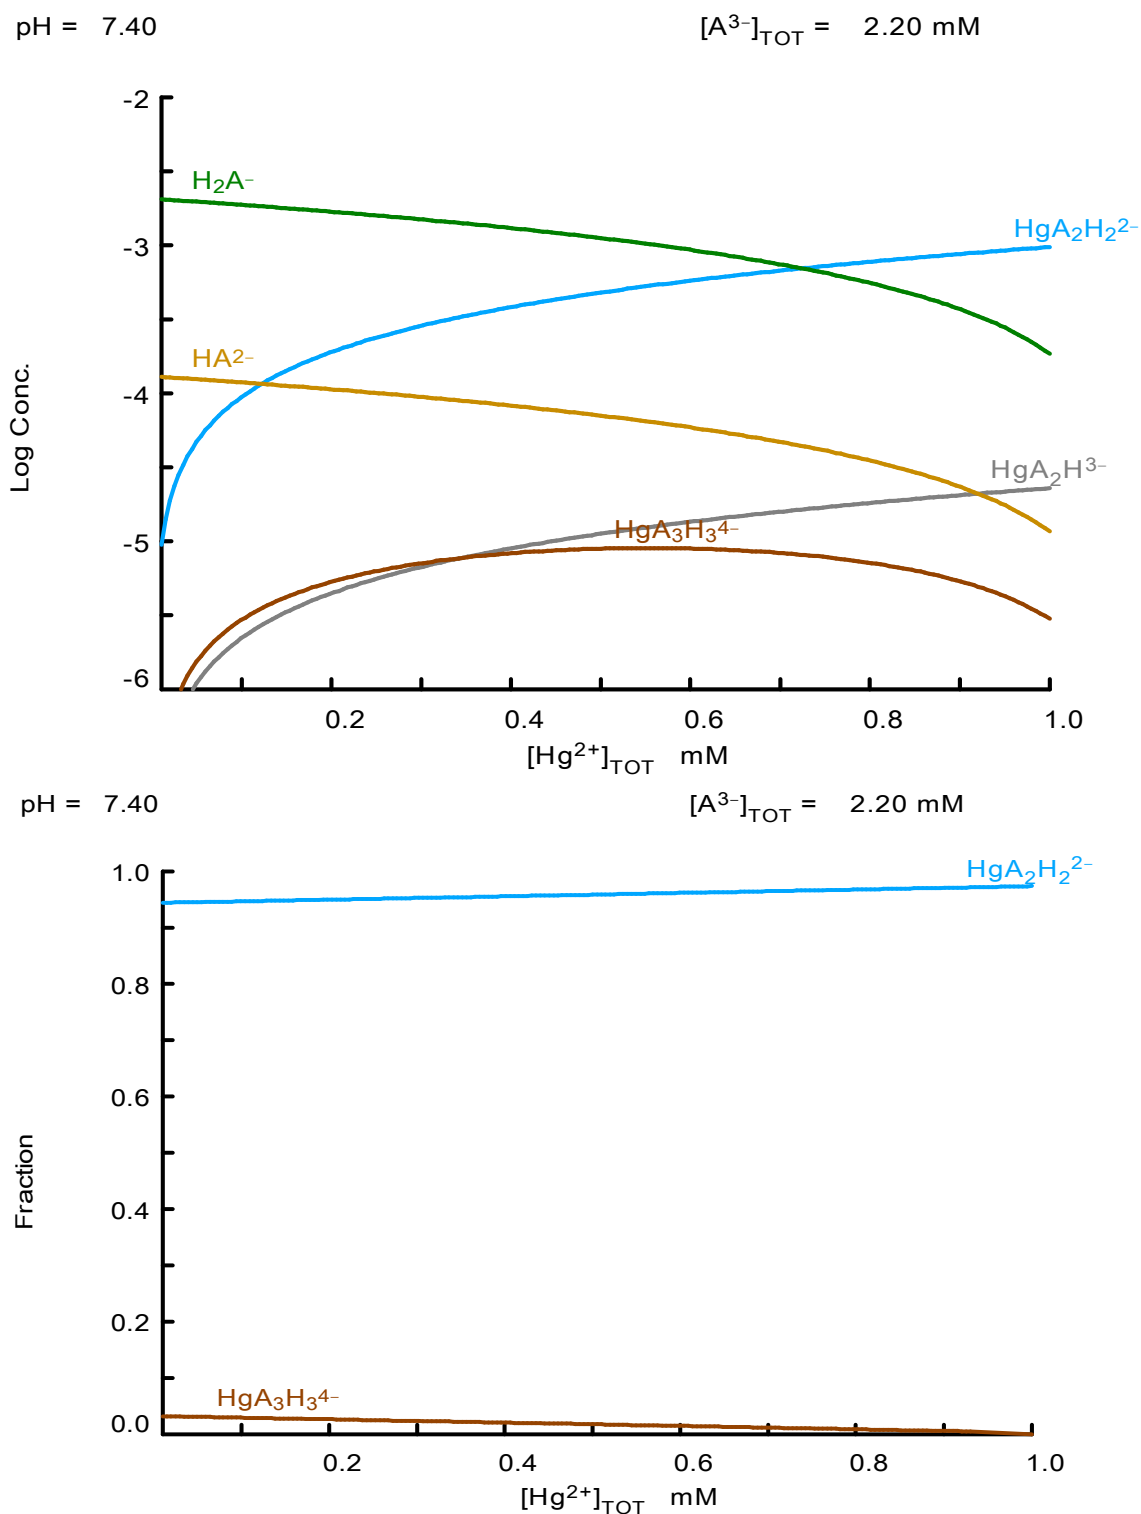

Supplement: NIHMS244970-supplement-1_si_001.pdf [file NIHMS244970-supplement-1_si_001.pdf]
